# Supplementary material
Source: ML conference proceedings conference paper supplement (https://proceedings.neurips.cc/paper_files/paper/2018/hash/7e448ed9dd44e6e22442dac8e21856ae-Abstract.html)
Supplement: Supplementary file [file 7e448ed9dd44e6e22442dac8e21856ae-Supplemental.zip]

# Supplementary Material: Multi-objective Maximization of Monotone Submodular Functions with Cardinality Constraint

## 1 Some More Notation and Preliminaries

Let  $\beta(\eta) = 1 - \frac{1}{e^\eta} \in [0, 1 - 1/e]$  for  $\eta \in [0, 1]$ . Note that  $\beta(1) = (1 - 1/e)$ . Further, for  $k' \leq k$ ,

$$\beta(k'/k) = (1 - e^{1-k'/k}/e) \geq (1 - 1/e)k'/k. \quad (1)$$

This function appears naturally in our analysis and will be useful for expressing approximation guarantees. Next, the lemma below formalizes Stage 2 of the algorithm in [CVZ10].

**Lemma 8.** ([CVZ10] Lemma 7.3) *Given submodular functions  $f_i$  and values  $V_i$ , cardinality  $k$ , the continuous greedy algorithm finds a point  $\mathbf{x} \in [0, 1]^n$  such that  $F_i(\mathbf{x}(k)) \geq (1 - 1/e - \epsilon')V_i \forall i$  with  $\epsilon' = 1/\Omega(k)$ , or outputs a certificate of infeasibility.*

## 2 Missing Proofs from Section 3.1

**Corollary 9.** *Given a point  $\mathbf{x} \in [0, 1]^n$  with  $|\mathbf{x}| = k$  and a multilinear extension  $F$  of a monotone submodular function, for every  $k_1 \leq k$ ,*

$$F\left(\frac{k_1}{k}\mathbf{x}\right) \geq \frac{k_1}{k}F(\mathbf{x}).$$

*Proof.* Note that the statement is true for concave  $F$ . The proof now follows directly from the concavity of multilinear extensions in positive directions (Section 2.1 of [CCPV11]).  $\square$

**Lemma 10.**  $F_i(\mathbf{x}(k_1)|\mathbf{x}_{S_1}) \geq (\beta(1) - \epsilon')\frac{k_1}{k}(V_i - f_i(S_1))$  for every  $i$ .

*Proof.* Recall that  $S_k$  denotes a feasible solution with cardinality  $k$ , and let  $\mathbf{x}_{S_k}$  denote its characteristic vector. Clearly,  $|\mathbf{x}_{S_k \setminus S_1}| \leq k$  and  $F_i(\mathbf{x}_{S_k \setminus S_1}|\mathbf{x}_{S_1}) = f_i(S_k|S_1) \geq (V_i - f_i(S_1))$  for every  $i$ . And now from Corollary 9, we have that there exists a point  $\mathbf{x}'$  with  $|\mathbf{x}'| = k_1$  such that  $F_i(\mathbf{x}'|\mathbf{x}_{S_1}) \geq \frac{k_1}{k}F_i(\mathbf{x}_{S_k \setminus S_1}|\mathbf{x}_{S_1})$  for every  $i$ . Finally, using Lemma 8 we have  $F_i(\mathbf{x}(k_1)|\mathbf{x}_{S_1}) \geq (\beta(1) - \epsilon')F_i(\mathbf{x}'|\mathbf{x}_{S_1})$ , which gives the desired bound.  $\square$

## 3 Missing Proofs from Section 3.2

**Lemma 3.**  $g^t(X^t) \geq \frac{k_1}{k}\alpha \sum_i \lambda_i^t, \forall t$ .

*Proof.* Consider the optimal set  $S_k$  and note that  $\sum_i \lambda_i^t \tilde{f}_i(S_k) \geq \sum_i \lambda_i^t, \forall t$ . Now the function  $g^t(\cdot) = \sum_i \lambda_i^t \tilde{f}_i(\cdot)$ , being a convex combination of monotone submodular functions, is also monotone submodular. We would like to show that there exists a set  $S'$  of size  $k_1$  such that  $g^t(S') \geq \frac{k_1}{k} \sum_i \lambda_i^t$ . Then the claim follows from the fact that  $\mathcal{A}$  is an  $\alpha$  approximation for monotone submodular maximization with cardinality constraint.

To see the existence of such a set  $S'$ , greedily index the elements of  $S_k$  using  $g^t(\cdot)$ . Suppose that the resulting order is  $\{s_1, \dots, s_k\}$ , where  $s_i$  is such that  $g^t(s_i|\{s_1, \dots, s_{i-1}\}) \geq g^t(s_j|\{s_1, \dots, s_{i-1}\})$  for every  $j > i$ . Then the truncated set  $\{s_1, \dots, s_{k_1}\}$  has the desired property, and we are done.  $\square$

**Lemma 4.**

$$\frac{\sum_t \tilde{f}_i(X^t)}{T} \geq \frac{k_1}{k}(1 - 1/e) - \delta, \forall i.$$

*Proof.* Suppose we have,

$$\frac{\sum_t \tilde{f}_i(X^t)}{T} - \alpha + \delta \geq \frac{1}{T} \sum_t \sum_i \frac{\lambda_i^t}{\sum_i \lambda_i^t} (\tilde{f}_i(X^t) - \alpha), \forall i. \quad (2)$$

Then assuming  $\alpha = (1 - 1/e)$ , the RHS above simplifies to,

$$\frac{1}{T} \sum_t \frac{g(X^t)}{\sum_i \lambda_i^t} - (1 - 1/e) \geq (1 - 1/e) \left( \frac{k_1}{k} - 1 \right) \quad (\text{using Lemma 3})$$

And we have for every  $i$ ,

$$\begin{aligned} \frac{\sum_t \tilde{f}_i(X^t) - (1 - 1/e)}{T} + \delta &\geq (1 - 1/e) \left( \frac{k_1}{k} - 1 \right) \\ \frac{\sum_t \tilde{f}_i(X^t)}{T} &\geq \frac{k_1}{k} (1 - 1/e) - \delta. \end{aligned}$$

Now, the proof for (2) closely resembles the analysis in Theorem 3.3 and 2.1 in **(author?)** AHK12. We will use the potential function  $\Phi^t = \sum_i \lambda_i^t$ . Let  $p_i^t = \lambda_i^t / \Phi^t$  and  $M^t = \sum_i p_i^t m_i^t$ . Then we have,

$$\begin{aligned} \Phi^{t+1} &= \sum_i \lambda_i^t (1 - \delta m_i^t) \\ &= \Phi^t - \delta \Phi^t \sum_i p_i^t m_i^t \\ &= \Phi^t (1 - \delta M^t) \leq \Phi^t e^{-\delta M^t} \end{aligned}$$

After  $T$  rounds,  $\Phi^T \leq \Phi^1 e^{-\delta \sum_t M^t}$ . Further, for every  $i$ ,

$$\begin{aligned} \Phi^T &\geq w_i^T = \frac{1}{m} \prod_t (1 - \delta m_i^t) \\ \ln(\Phi^1 e^{-\delta \sum_t M^t}) &\geq \sum_t \ln(1 - \delta m_i^t) - \ln m \\ \delta \sum_t M^t &\leq \ln m + \sum_t \ln(1 - \delta m_i^t) \end{aligned}$$

Using  $\ln(\frac{1}{1-\epsilon}) \leq \epsilon + \epsilon^2$  and  $\ln(1 + \epsilon) \geq \epsilon - \epsilon^2$  for  $\epsilon \leq 0.5$ , and with  $T = \frac{2 \ln m}{\delta^2}$  and  $\delta < (1 - 1/e)$  (for a positive approximation guarantee), we have,

$$\frac{\sum_t M^t}{T} \leq \delta + \frac{\sum_t m_i^t}{T}, \forall i.$$

□

**Lemma 5.** Given monotone submodular function  $f$ , its multilinear extension  $F$ , sets  $X^t$  for  $t \in \{1, \dots, T\}$ , and a point  $\mathbf{x} = \sum_t X^t / T$ , we have,

$$F(\mathbf{x}) \geq (1 - 1/e) \frac{1}{T} \sum_{t=1}^T f(X^t).$$

*Proof.* Consider the concave closure of a submodular function  $f$ ,

$$f^+(\mathbf{x}) = \max_{\alpha} \left\{ \sum_X \alpha_X f(X) \mid \sum_X \alpha_X X = \mathbf{x}, \sum_X \alpha_X \leq 1, \alpha_X \geq 0 \forall X \subseteq N \right\}.$$

Clearly,  $f_i^+(\mathbf{x}) \geq \frac{\sum_t f_i(X^t)}{T}$ . So it suffices to show  $F_i(\mathbf{x}) \geq (1 - 1/e) f_i^+(\mathbf{x})$ , which in fact, follows from Lemmas 4 and 5 in [CCPV07].

Alternatively, we now give a novel and direct proof for the statement. We abuse notation and use  $\mathbf{x}_{X^t}$  and  $X^t$  interchangeably. Let  $\mathbf{x} = \sum_{t=1}^T X^t / T$  and w.l.o.g., assume that sets  $X^t$  are indexed such that  $f(X^j) \geq f(X^{j+1})$  for every  $j \geq 1$ . Further, let  $f(X^t)/T = a^t$  and  $\sum_t a^t = A$ .

Recall that  $F(\mathbf{x})$  can be viewed as the expected function value of the set obtained by independently sampling element  $j$  with probability  $x_j$ . Instead, consider the alternative random process where starting with  $t = 1$ , one samples each element in set  $X^t$  independently with probability  $1/T$ . The random process runs in  $T$  steps and the probability of an element  $j$  being chosen at the end of the process is exactly  $p_j = 1 - (1 - 1/T)^{T x_j}$ , independent of all other elements. Let  $\mathbf{p} = (p_1, \dots, p_n)$ , it follows that the expected value of the set sampled using this process is given by  $F(\mathbf{p})$ . Observe that for every  $j$ ,  $p_j \leq x_j$  and therefore,  $F(\mathbf{p}) \leq F(\mathbf{x})$ . Now in step  $t$ , suppose the newly sampled

subset of  $X^t$  adds marginal value  $\Delta^t$ . From submodularity we have,  $\mathbb{E}[\Delta^1] \geq \frac{f(X^1)}{T} = a^1$  and in general,  $\mathbb{E}[\Delta^t] \geq \frac{f(X^t) - \mathbb{E}[\sum_{j=1}^{t-1} \Delta_j]}{T} \geq a^t - \frac{1}{T} \sum_{j=1}^{t-1} \mathbb{E}[\Delta^j]$ .

To see that  $\sum_t \mathbb{E}[\Delta^t] \geq (1 - 1/e)A$ , consider a LP where the objective is to minimize  $\sum_t \gamma^t$  subject to  $b^1 \geq b^2 \geq \dots \geq b^T \geq 0$ ;  $\sum b^t = A$  and  $\gamma^t \geq b^t - \frac{1}{T} \sum_{j=1}^{t-1} \gamma^j$  with  $\gamma^0 = 0$ . Here  $A$  is a parameter and everything else is a variable. Observe that the extreme points are characterized by  $j$  such that,  $\sum b^t = A$  and  $b^t = b^1$  for all  $t \leq j$  and  $b^{j+1} = 0$ . For all such points, it is not difficult to see that the objective is at least  $(1 - 1/e)A$ . Therefore, we have  $F(\mathbf{p}) \geq (1 - 1/e)A = (1 - 1/e) \sum_t f(X^t)/T$ , as desired.  $\square$

#### 4 Missing Proofs from Section 3.3

**Lemma 7.** *Given that there exists a set  $S_k$  such that  $f_i(S_k) \geq V_i, \forall i$  and  $\epsilon < \frac{1}{8 \ln m}$ . For every  $k' \in [m/\epsilon^3, k]$ , there exists  $S_{k'} \subseteq S_k$  of size  $k'$ , such that,*

$$f_i(S_{k'}) \geq (1 - \epsilon) \left( \frac{k' - m/\epsilon^3}{k - m/\epsilon^3} \right) V_i, \forall i.$$

*Proof.* We restrict our ground set of elements to  $S_k$  and let  $S_1$  be a subset of size at most  $m/\epsilon^3$  such that  $f_i(e|S_1) < \epsilon^3 V_i, \forall e \in S_k \setminus S_1$  and  $\forall i$  (recall, we discussed the existence of such a set in Section 2.1, Stage 1). The rest of the proof is similar to the proof of Lemma 10. Consider the point  $\mathbf{x} = \frac{k' - |S_1|}{k - |S_1|} \mathbf{x}_{S_k \setminus S_1}$ . Clearly,  $|\mathbf{x}| = k' - |S_1|$ , and from Corollary 9, we have  $F_i(\mathbf{x}|\mathbf{x}_{S_1}) \geq \frac{k' - |S_1|}{k - |S_1|} F_i(\mathbf{x}_{S_k \setminus S_1}|\mathbf{x}_{S_1}) = \frac{k' - |S_1|}{k - |S_1|} f_i(S_k \setminus S_1|S_1) \geq \frac{k' - |S_1|}{k - |S_1|} (V_i - f_i(S_1)), \forall i$ . Finally, using swap rounding Lemma 1, there exists a set  $S_2$  of size  $k' - |S_1|$ , such that  $f_i(S_1 \cup S_2) \geq (1 - \epsilon) \frac{k' - |S_1|}{k - |S_1|} V_i, \forall i$ .  $\square$

**Theorem 8.** *For  $k' = \frac{m}{\epsilon^4}$ , choosing  $k'$ -tuples greedily w.r.t.  $h(\cdot) = \min_i f_i(\cdot)$  yields approximation guarantee  $(1 - 1/e)(1 - 2\epsilon)$  for  $k \rightarrow \infty$ , while making  $n^{m/\epsilon^4}$  queries.*

*Proof.* The analysis generalizes that of the standard greedy algorithm ([NW78, NWF78]). Let  $S_j$  denote the set at the end of iteration  $j$ .  $S_0 = \emptyset$  and let the final set be  $S_{\lfloor k/k' \rfloor}$ . Then from Theorem 7, we have that at step  $j + 1$ , there is some set  $X \in S_k \setminus S_j$  of size  $k'$  such that

$$f_i(X|S_j) \geq (1 - \epsilon) \frac{k' - m/\epsilon^3}{k - m/\epsilon^3} (V_i - f_i(S_j)), \forall i.$$

To simplify presentation let  $\eta = (1 - \epsilon) \frac{k' - m/\epsilon^3}{k - m/\epsilon^3}$  and note that  $\eta \leq 1$ . Further,  $1/\eta \rightarrow \infty$  as  $k \rightarrow \infty$  for fixed  $m$  and  $k' = o(k)$ . Now, we have for every  $i$ ,  $f_i(S_{j+1}) - (1 - \eta) f_i(S_j) \geq \eta V_i$ . Call this inequality  $j + 1$ . Observe that inequality  $\lfloor k/k' \rfloor$  states  $f_i(S_{\lfloor k/k' \rfloor}) - (1 - \eta) f_i(S_{\lfloor k/k' \rfloor - 1}) \geq \eta V_i, \forall i$ . Therefore, multiplying inequality  $\lfloor k/k' \rfloor - j$  by  $(1 - \eta)^j$  and telescoping over  $j$  we get for every  $i$ ,

$$\begin{aligned} f_i(S_{\lfloor k/k' \rfloor}) &\geq \sum_{j=0}^{\lfloor k/k' \rfloor - 1} (1 - \eta)^j \eta V_i \\ &\geq (1 - (1 - \eta)^{\lfloor k/k' \rfloor}) V_i \\ &\geq (1 - (1 - \eta)^{\frac{1}{\eta} \eta \lfloor k/k' \rfloor}) V_i \\ &\geq \beta(\eta \lfloor k/k' \rfloor) V_i \geq (1 - 1/e)(\eta \lfloor k/k' \rfloor) V_i. \end{aligned}$$

Where we used (1) for the last inequality. Let  $\epsilon = \sqrt[4]{\frac{m}{k'}}$ , then we have,

$$\eta \lfloor k/k' \rfloor \geq (1 - \epsilon) \frac{1 - m/k'\epsilon^3}{1 - m/k\epsilon^3} \left( 1 - \frac{k'}{k} \right) \geq \frac{\left( 1 - \sqrt[4]{\frac{m}{k'}} \right)^2}{1 - \frac{1}{k} \sqrt[4]{\frac{m}{(k')^3}}} \left( 1 - \frac{k'}{k} \right)$$

As  $k \rightarrow \infty$  we get the asymptotic guarantee  $(1 - 1/e) \left( 1 - \sqrt[4]{\frac{m}{k'}} \right)^2 = (1 - 1/e)(1 - \epsilon)^2$ .  $\square$

## References

- [AHK12] S. Arora, E. Hazan, and S. Kale. The multiplicative weights update method: a meta-algorithm and applications. *Theory of Computing*, 8:121–164, 2012.
- [CCPV07] G. Calinescu, C. Chekuri, Martin Pál, and J. Vondrák. Maximizing a submodular set function subject to a matroid constraint. In *IPCO*, volume 7, pages 182–196, 2007.
- [CCPV11] G. Calinescu, C. Chekuri, M. Pál, and J. Vondrák. Maximizing a monotone submodular function subject to a matroid constraint. *SIAM Journal on Computing*, 40(6):1740–1766, 2011.
- [CVZ10] C. Chekuri, J. Vondrák, and R. Zenklusen. Dependent randomized rounding via exchange properties of combinatorial structures. In *FOCS 10*, pages 575–584. IEEE, 2010.
- [NW78] G.L. Nemhauser and L.A. Wolsey. Best algorithms for approximating the maximum of a submodular set function. *Mathematics of operations research*, 3(3):177–188, 1978.
- [NWF78] G.L. Nemhauser, L.A. Wolsey, and M.L. Fisher. An analysis of approximations for maximizing submodular set functions—i. *Mathematical Programming*, 14(1):265–294, 1978.
